# Supplementary material
Source: PubMed Central journal article supplement (PMC10873102)
Supplement: NIHMS1936862-supplement-1.pdf [file NIHMS1936862-supplement-1.pdf]

### Supplementary Figure S1: CRC screening programs over the study period

CRC screening programs at Parkland were either opportunistic or organized, had different components and were conducted at various times during the study period.

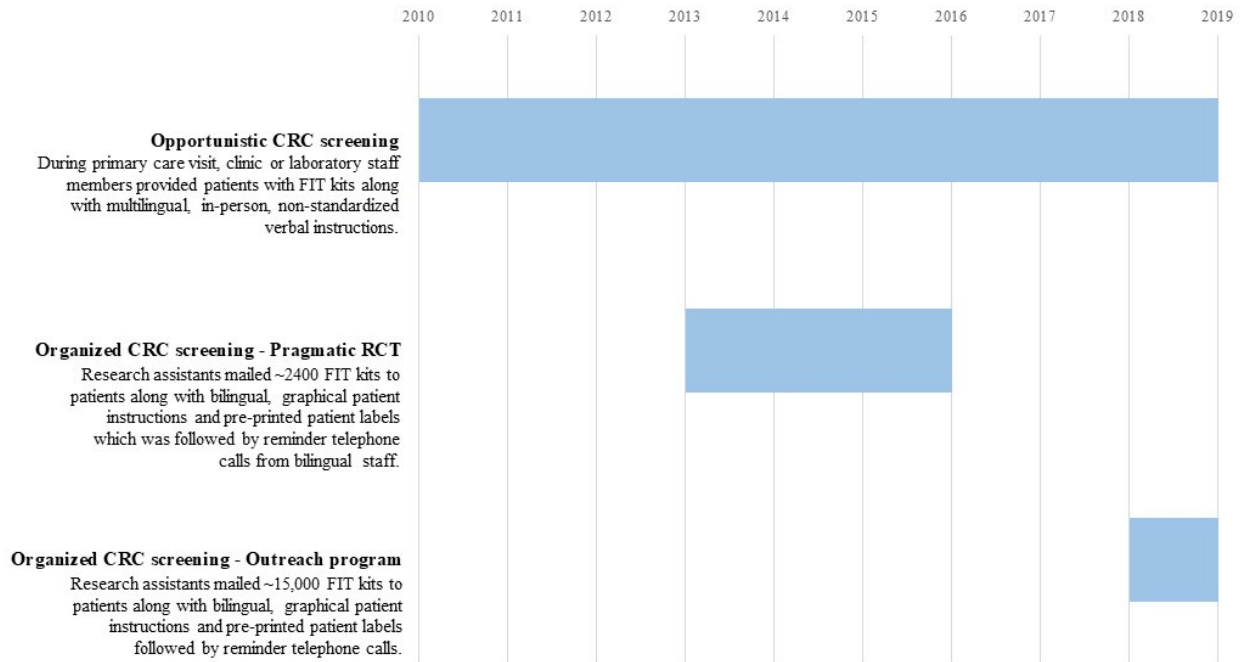

Figure S1
